# Supplementary material for: Expression and distribution of extensins and AGPs in susceptible and resistant banana cultivars in response to wounding and Fusarium oxysporum
Source: PubMed Central journal article supplement (PMC5316987; doi:10.1038/srep42400), 2017-02-20
Supplement: srep42400-s1.pdf [file srep42400-s1.pdf]

**Expression and distribution of extensins and AGPs in susceptible and resistant banana cultivars in response to wounding and *Fusarium oxysporum*.**

Yunli Wu<sup>1</sup>, Wei Fan<sup>1</sup>, Xiaoquan Li<sup>2</sup>, Houbin Chen<sup>1</sup>, Tomáš Takáč<sup>3</sup>, Olga Šamajová<sup>3</sup>, Musana Rwalinda Fabrice<sup>1</sup>, Ling Xie<sup>1</sup>, Juan Ma<sup>1</sup>, Jozef Šamaj<sup>3</sup>, Chunxiang Xu<sup>1\*</sup>

\*Author for correspondence: Chunxiang Xu

Email: [chxxu@scau.edu.cn](mailto:chxxu@scau.edu.cn)

**Supplementary Figures S1–S4 and Tables S1–S3**

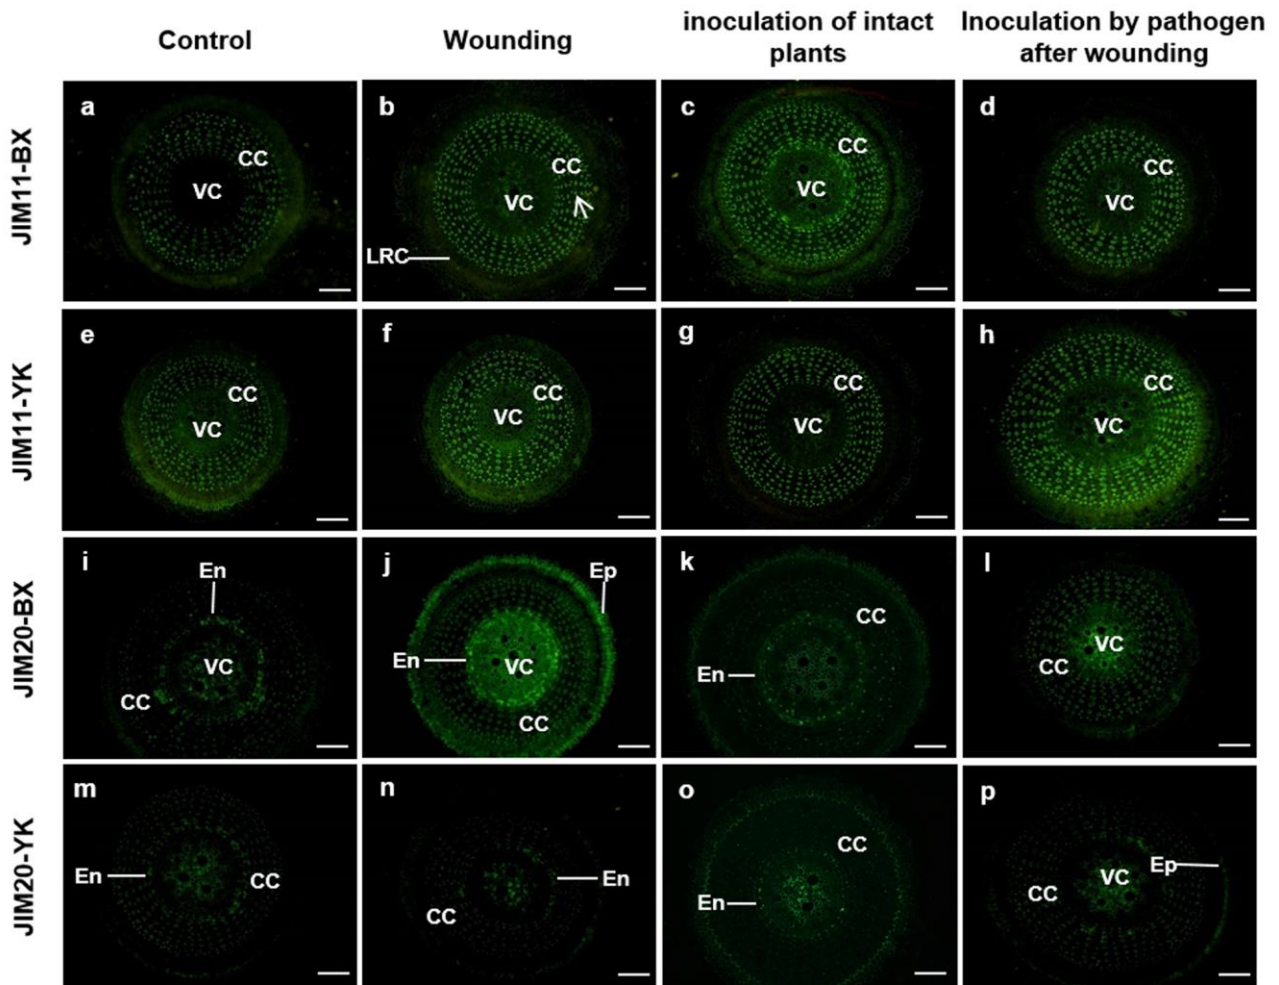

**Figure S1. Immunolocalization of JIM11 and JIM20 binding extensins in banana (*Musa* spp. AAA) roots in response to wounding and *Fusarium oxysporum* f. sp. *ubense*.** In all cases, cross sections through roots are presented. BX, Baxijiao (susceptible); YK, Yueyoukang 1 (resistant). CC, cortical cells; En, endodermis; Ep, epidermis; LRC, lateral root cap; VC, vascular cylinder. Arrow points to tricellular cell–cell junction. Bars represent 100  $\mu$ m.

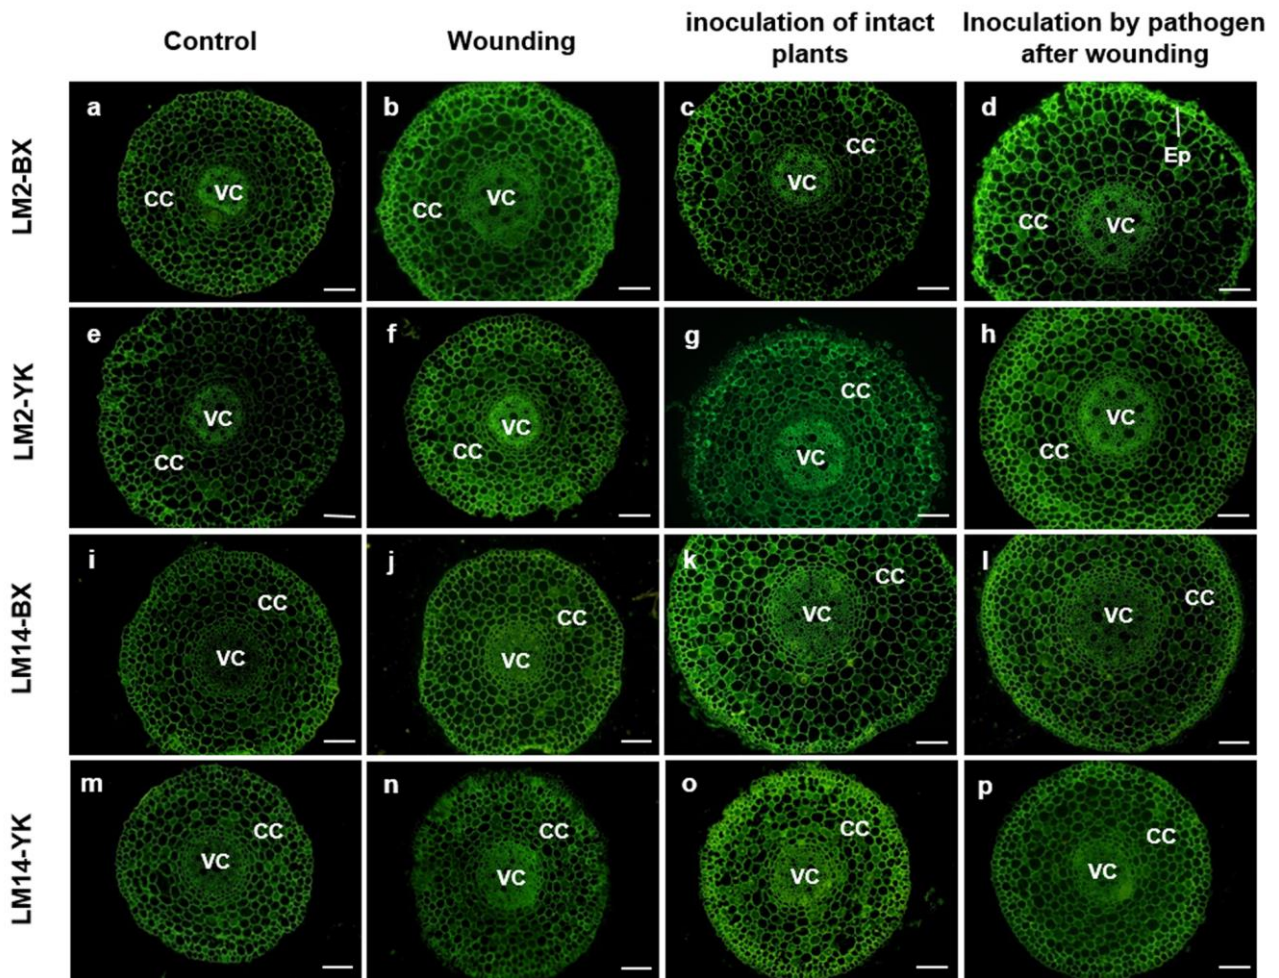

**Figure S2. Immunolocalization of LM2 and LM14 binding AGPs in banana (*Musa* spp. AAA) roots in response to wounding and *Fusarium oxysporum* f. sp. *ubense*.** In all cases, cross sections through roots are presented. BX, Baxijiao (susceptible); YK, Yueyoukang 1 (resistant). CC, cortical cells; Ep, epidermis; VC, vascular cylinder. Bars represent 100  $\mu$ m.

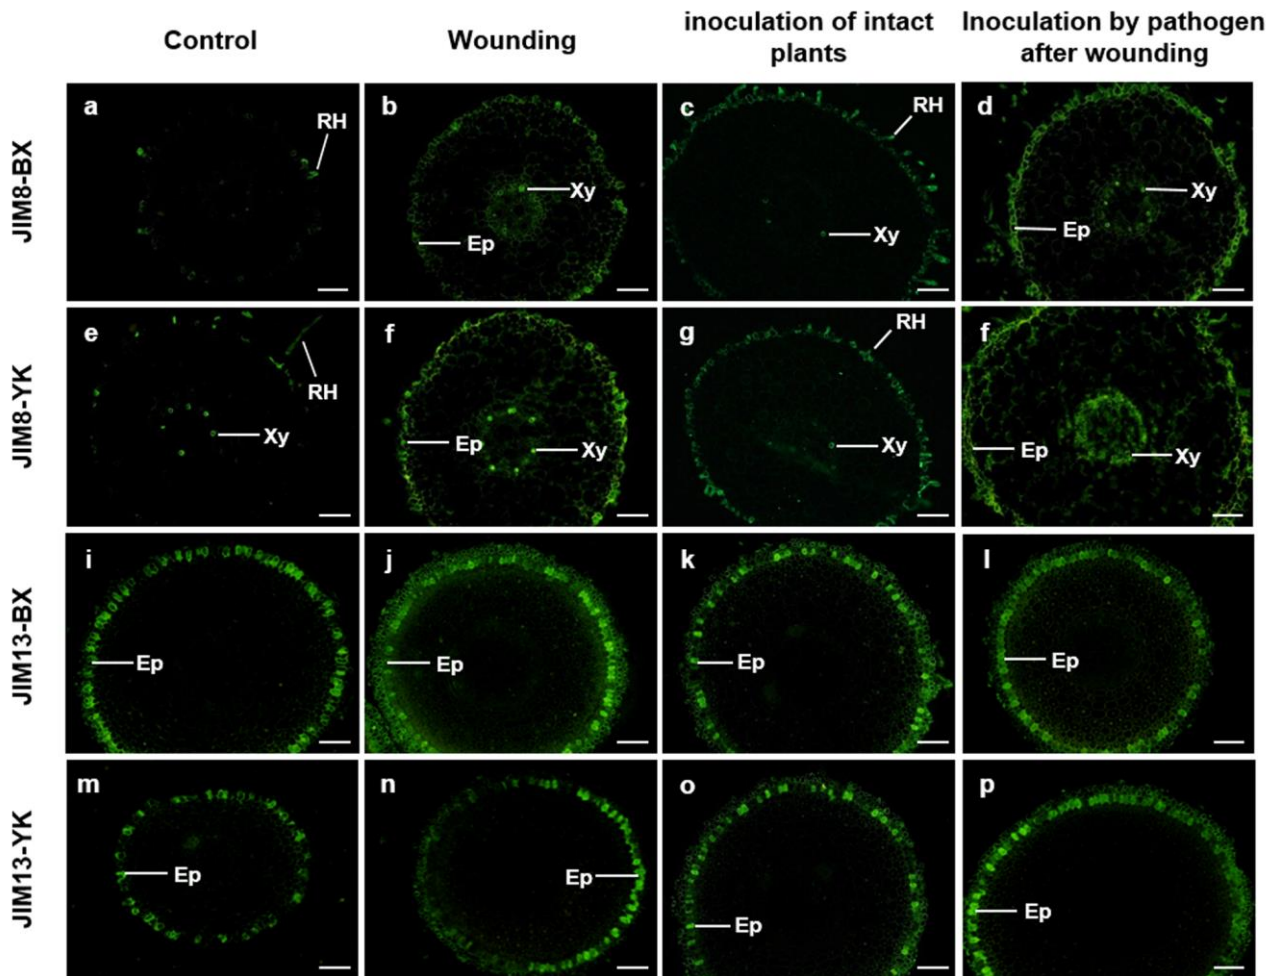

**Figure S3. Immunolocalization of JIM8 and JIM13 binding AGPs in banana (*Musa* spp. AAA) roots in response to wounding and *Fusarium oxysporum* f. sp. *ubense*.** In all cases, cross sections through roots are presented. BX, Baxijiao (susceptible); YK, Yueyoukang 1 (resistant). Ep, epidermis; RH, root hairs; Xy, xylem. Bars represent 100  $\mu$ m.

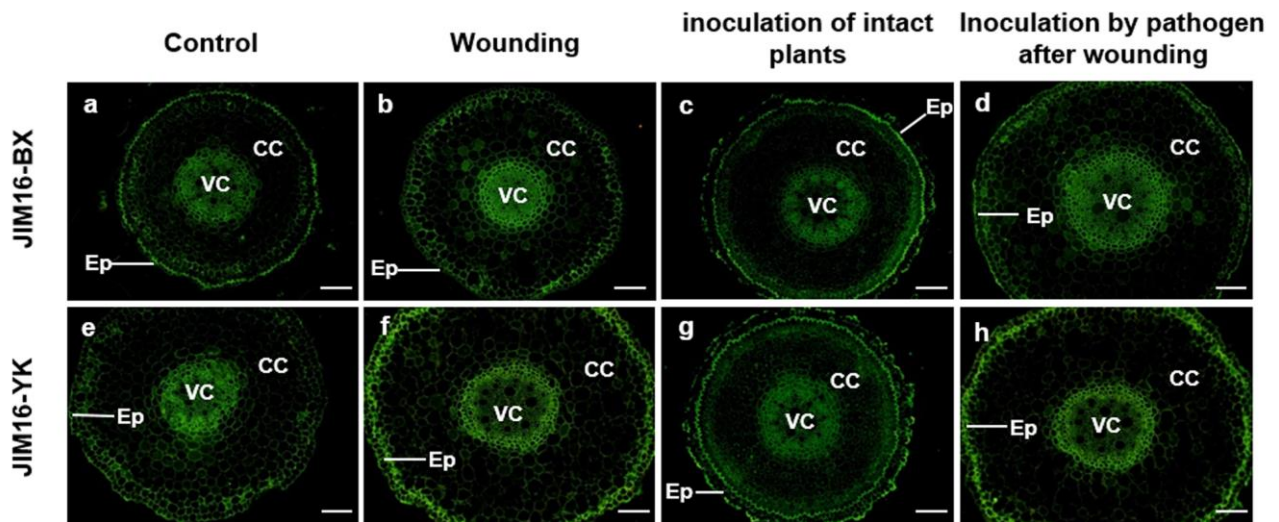

**Figure S4. Immunolocalization of JIM16 binding AGPs in banana (*Musa* spp. AAA) roots in response to wounding and *Fusarium oxysporum* f. sp. *cubense*.** In all cases, cross sections through roots are presented. BX, Baxijiao (susceptible); YK, Yueyoukang 1 (resistant). CC, cortical cells; Ep, epidermis; VC, vascular cylinder. Bars represent 100  $\mu$ m.

**Table S1. The intensity of immunofluorescence labelling of banana (*Musa* spp. AAA) roots with different extensins and arabinogalactan proteins antibodies.**

| Antibody used | Root cap | Epidermis | Cortical cells | Endodermis | Root hairs | BLCs | Vascular cylinder |        |              |
|---------------|----------|-----------|----------------|------------|------------|------|-------------------|--------|--------------|
|               |          |           |                |            |            |      | Pericycle         | Phloem | Xylem and VP |
| JIM11         | ++       | +         | +              | ++         | -          | -    | ±                 | ±      | ++           |
| JIM20         | ++       | ±         | ±              | +          | -          | -    | +                 | +      | ++++         |
| LM2           | ±        | ±         | +++            | +          | -          | -    | +                 | ++++   | ++++         |
| LM14          | +        | ±         | ++             | ++         | -          | -    | ++                | ++     | ++           |
| JIM16         | ++++     | ++++      | ±              | +++        | -          | ++++ | +++               | ++++   | +            |
| JIM13         | ++++     | ++++      | -              | -          | ++++       | ++++ | -                 | -      | ++++         |
| JIM8          | +++      | ±         | -              | -          | +++        | -    | -                 | -      | ++++         |
| PN16.4B4      | ++       | ±         | -              | -          | ++         | -    | -                 | -      | ++           |
| CCRC-M134     | +        | ±         | -              | -          | ±          | -    | -                 | -      | ±            |

Increasing intensity of immunolabelling was evaluated as: – (no labelling), ± (very weak), + (weak), ++ (middle), +++ (strong), ++++ (very strong). BLCs, border-like cells, VP, vascular parenchyma.

**Table S2. Gene information.**

| Gene family | Gene ID      | Gene name        | Gene description                                            |
|-------------|--------------|------------------|-------------------------------------------------------------|
|             | LOC103994065 | <i>MaELP-1</i>   | extensin-like protein                                       |
|             | LOC103997407 | <i>MaELP-2</i>   | extensin-like protein                                       |
| Extensins   | LOC103989053 | <i>MaLRX3</i>    | pollen-specific leucine-rich repeat extensin-like protein 3 |
|             | LOC103997909 | <i>MaLRX4</i>    | leucine-rich repeat extensin-like protein 4                 |
|             | LOC103973738 | <i>MaPELP-1</i>  | pistil-specific extensin-like protein                       |
|             | LOC103991051 | <i>MaPELP-2</i>  | pistil-specific extensin-like protein                       |
|             | LOC103996093 | <i>MaPELP-3</i>  | pistil-specific extensin-like protein                       |
|             | LOC103975630 | <i>MaAGP4-1</i>  | classical arabinogalactan protein 4-like                    |
|             | LOC103982666 | <i>MaAGP4-2</i>  | classical arabinogalactan protein 4-like                    |
|             | LOC103973630 | <i>MaAGP7</i>    | classical arabinogalactan protein 7-like                    |
|             | LOC104000828 | <i>MaAGP16</i>   | arabinogalactan peptide 16-like                             |
|             | LOC103979425 | <i>MaAGP18-1</i> | lysine-rich arabinogalactan protein 18-like                 |
|             | LOC103992896 | <i>MaAGP18-2</i> | lysine-rich arabinogalactan protein 18-like                 |
|             | LOC103975936 | <i>MaAGP19-1</i> | lysine-rich arabinogalactan protein 19-like                 |
|             | LOC103978045 | <i>MaAGP19-2</i> | lysine-rich arabinogalactan protein 19-like                 |
|             | LOC103991644 | <i>MaAGP20</i>   | arabinogalactan peptide 20-like                             |
|             | LOC103985508 | <i>MaAGP23-1</i> | arabinogalactan peptide 23-like                             |
|             | LOC103997732 | <i>MaAGP23-2</i> | arabinogalactan peptide 23-like                             |
| AGPs        | LOC103993392 | <i>MaAGP26</i>   | classical arabinogalactan protein 26-like                   |
|             | LOC103995161 | <i>MaASD1</i>    | alpha-L-arabinofuranosidase 1-like                          |
|             | LOC103968476 | <i>MaFLA1</i>    | fasciclin-like arabinogalactan protein 1                    |
|             | LOC103972757 | <i>MaFLA2-1</i>  | fasciclin-like arabinogalactan protein 2                    |
|             | LOC103998373 | <i>MaFLA2-2</i>  | fasciclin-like arabinogalactan protein 2                    |
|             | LOC103987751 | <i>MaFLA6</i>    | fasciclin-like arabinogalactan protein 6                    |
|             | LOC103980339 | <i>MaFLA7</i>    | fasciclin-like arabinogalactan protein 7                    |
|             | LOC103970284 | <i>MaFLA8</i>    | fasciclin-like arabinogalactan protein 8                    |
|             | LOC103986177 | <i>MaFLA11</i>   | fasciclin-like arabinogalactan protein 11                   |
|             | LOC103988759 | <i>MaFLA12</i>   | fasciclin-like arabinogalactan protein 12                   |
|             | LOC104001024 | <i>MaFLA13</i>   | fasciclin-like arabinogalactan protein 13                   |
|             | LOC103983519 | <i>MaFLA16</i>   | fasciclin-like arabinogalactan protein 16                   |

AGPs, arabinogalactan proteins

**Table S3. Primers for qPCR.**

| Gene family | Gene name        | Primer sequences (Forward/ Reverse)              | Production size (bp) |
|-------------|------------------|--------------------------------------------------|----------------------|
|             | <i>18S rRNA</i>  | CCTGAGAAACGGCTACCACAT<br>CACCAGACTTGCCTCCA       | 171                  |
|             | <i>MaELP-1</i>   | TTCCCACCATCATCTCCAAG<br>GGTCTTGTTGAGCTGCCTCTA    | 119                  |
|             | <i>MaELP-2</i>   | TACAAGACCATCCCTGAGCAC<br>ACACTGCGTCATCTTCAACG    | 122                  |
| Extensins   | <i>MaLRX3</i>    | GTGTCGTTTGTAGCGATCAGG<br>CATGGAGAGAGCGGTTTACAG   | 134                  |
|             | <i>MaLRX4</i>    | TGTAGGCGTGTCCATATGCTTC<br>AAAGGAAGAGATAGGGGGAGTG | 100                  |
|             | <i>MaPELP-1</i>  | CTCTCTACACCGCAGGCTTCT<br>CCTCTCATCAAACGACTACCG   | 117                  |
|             | <i>MaPELP-2</i>  | GTCCACTGTACTCGAGCTTGC<br>GCTCAAAGGCTCAACACAGAG   | 132                  |
|             | <i>MaAGP4-1</i>  | CCGTTGCCATTTTGGTCA<br>GTCCATCACAACGGGGATACT      | 130                  |
|             | <i>MaAGP7</i>    | CCTTACCTTCAGCTGGGTCA<br>AAACCGTGCGATCAGTATCC     | 121                  |
|             | <i>MaAGP18-1</i> | GCCGACCAGACAAGTGGT<br>ATGTAGTGTCTCGGGGAGCTT      | 116                  |
|             | <i>MaAGP23-1</i> | GCTCTCCTTCTTCGCCTTCTA<br>CTGGTGGAGCTGACAACAATC   | 104                  |
| AGPs        | <i>MaAGP23-2</i> | GACGGCGAGAGAGTCTGG<br>GCCTGCAAAGGAGAAGAAGA       | 106                  |
|             | <i>MaFLA6</i>    | CAAGCAAGCCAAAGAGGAAG<br>AGAGAAGGTGACTGCCCAAC     | 106                  |
|             | <i>MaFLA11</i>   | GCCAAGAAGCAGAAACCAAG<br>CACTCAGAAGCTCCACCACA     | 159                  |
|             | <i>MaFLA12</i>   | CGGGAATTTCAACTCCTTCA<br>GGTCACGTTGAGCTTGAACA     | 292                  |
|             | <i>MaFLA16</i>   | GAAGTTGGGTGCAGTTTGCT<br>GGCAGGTGGTAACATTTGGT     | 130                  |

AGPs, arabinogalactan proteins
